# Supplementary material
Source: publisher site journal article supplement (https://www.degruyterbrill.com/publication/dbid/hitq/downloadAsset/HITQ_HITQ%20Benz%20-%20Holocaust--de.pdf)
Supplement: Supplementary file 1 [file HITQ_HITQ%20Benz%20-%20Holocaust--de.pdf]

Wolfgang Benz

## Holocaust – der Völkermord an den Juden Europas

Der Völkermord an den europäischen Juden, den die Täter mit der Metapher „Endlösung der Judenfrage“ umschrieben, den die Überlebenden und Nachkommen der Opfer hebräisch Shoah (Untergang, Verderben) nennen, für den sich allgemein der aus dem Griechischen über das Englische kommende schiefe Begriff Holocaust („Brandopfer“) eingebürgert hat, war das zur Metapher gewordene Verbrechen des 20. Jahrhunderts. Nicht nur die Bilanz von mindestens sechs Millionen Opfern, die im Vollzug der Ideologie des Rassenwahns gemordet wurden, macht diesen Genozid singular. Der Holocaust ist, trotz des Völkermords an den Armeniern am Anfang des Jahrhunderts und trotz vieler anderer historischer Genozide ohne Vorbild, denn der Mord an den Juden war keine Serie von Exzeßstaten, von Pogromen oder plötzlichem kollektiven Mordrausch, er war geplant, durchorganisiert und bis zur letzten Konsequenz nach kaltem Kalkül realisiert. Und zwar als Staatsraison von Angehörigen eines Volkes, das sich als vornehmste Kulturnation begriff und daraus das Recht ableitete, andere als minderwertig zu betrachten und nach Belieben zu vernichten.

Mit dem Sieg des Nationalsozialismus über die Demokratie war 1933 der Antisemitismus Staatsdoktrin in Deutschland geworden. Zu den Stationen der Entwicklung gehört die Verdrängung der Juden aus der Wirtschaft und Gesellschaft. Mit den Nürnberger Gesetzen wurden 1935 den Juden die Bürgerrechte aberkannt: Die Maßnahmen der Diskriminierung erfolgten ohne Protest der deutschen Bürger, wurden, da formal „legal“ als neues „Recht“ hingenommen. Im April 1938 mußten Juden ihre Vermögen deklarieren, ab Mai 1938 waren sie von öffentlichen Aufträgen ausgeschlossen, im Juli gab es eine besondere Kennkarte für sie, im August erging die Verordnung zur Führung der zusätzlichen Zwangsvornamen Sarah bzw. Israel, im Oktober wurde (auf Initiative Schweizer Behörden) in die Reisepässe ein J gestempelt. Zusätzliche Schikanen dachten sich Bürgermeister und Ortsgruppenleiter der NSDAP aus, wie die Schilder am Ortseingang „Juden unerwünscht“, die Parkbänke mit der Aufschrift „Nur für Arier“ oder das Verbot, städtische Badeanstalten zu benutzen. Nach dem „Anschluß“ im März 1938 wurde Österreich Experimentierfeld für die forcierte Auswanderung der etwa 200 000 Juden. Im Auftrag des Reichssicherheitshauptamtes übte die Zentralstelle für jüdische Auswanderung in Wien seit August 1938 entsprechenden Druck aus.

Das Attentat gegen einen Beamten der deutschen Botschaft in Paris aus Protest gegen die Deportation von 17 000 Juden polnischer Nationalität aus Deutschland – die Verzweiflungstat eines 17jährigen – bot den Nationalsozialisten dann den Anlaß zum Pogrom im November 1938. Das nationalsozialistische Regime machte eine „Verschwörung des Weltjudentums“ daraus und benutzte die Gelegenheit, Judenfeindschaft brutal und öffentlich zu demonstrieren. Man kann den Novemberpogrom als ein Ritual öffentlicher Demütigung deuten, als inszenierte Entwürdigung einer Minderheit, gegen die Vorurteile existierten und gegen die latente Haß- und Neidgefühle mobilisiert werden konnten. Der Pogrom bezeichnete die Wende der Judenpolitik, die nach der Austreibung Vernichtung intendierte.

Es ist strittig, ob das NS-Regime von Anfang an den Völkermord beabsichtigte (die Auswanderungspolitik spricht dagegen) oder einem Radikalisierungsprozeß unterlag, der durch den Krieg beschleunigt wurde. Das Reichssicherheitshauptamt (RSHA) als Zentrale von Gestapo, Sicherheitsdienst und Kriminalpolizei war die Schaltstelle, von der aus die Judenpolitik zunächst durch Deportation, dann als Völkermord organisiert wurde. Die entscheidenden Männer waren Heinrich Himmler, der als Reichsführer SS die oberste Instanz des Terrorapparates bildete, zu dem die Konzentrations- und Vernichtungslager und die Einsatzgruppen als mobile Mordeinheiten gehörten, und unter ihm die SS-Offiziere im Generalsrang wie Reinhard Heydrich und dessen Nachfolger Ernst Kaltenbrunner an der Spitze des RSHA, die „Höheren SS- und Polizeiführer“ in den besetzten Gebieten und die Befehlsempfänger wie Eichmann in der SS-Bürokratie oder die KZ-Kommandanten und ihre Wachmannschaften.

Mit der deutschen Besetzung Polens begann dort im Herbst 1939 die Verfolgung der Juden in radikaler Form mit Zwangsarbeit, Kennzeichnung und Konzentrierung der Juden in größeren Städten. Die Ghettos waren Orte des Zwangsaufenthaltes und der Ausbeutung, sie dienten als Relaisstationen eines riesigen Bevölkerungstransfers, der zu Beginn der Besatzungsherrschaft in Polen noch keine klaren Konturen hatte. Ab Anfang 1940 werden die Ghettos gegen die Außenwelt abgeriegelt. Ab 1941 sind sie auch das Ziel von Deportationen aus Deutschland. Zu den Ghettos in Warschau, Lodz und Krakau, Tschenstochau, Radom, Kielce und in vielen anderen Orten auf polnischem Boden kamen ab Juni 1941 mit dem Rußlandfeldzug die Ghettos in Ostpolen, Litauen, Estland und Lettland, Weißrußland und der Ukraine hinzu wie Wilna und Kaunas, Riga, Minsk und als eines der letzten Lemberg (August 1942). Die Ghettos bildeten nur eine Etappe in der Geschichte des Holocaust, sie waren 1940 bis 1943 Wartesäle zur Vernichtung, Vorhöfe der Hölle.

Im Herbst 1941 begannen, systematisch vorbereitet und gut organisiert, die Deportationen der deutschen Juden. Ziel waren ab Herbst 1941 erst die Ghettos und später direkt die Vernichtungslager im Osten. Mit der Deportation endete die bürgerliche Existenz, alle Vermögenswerte verfielen dem Deutschen Reich.

Zum Zeitpunkt des Überfalls auf die Sowjetunion im Juni 1941 war die Ausrottung der Juden bereits beschlossen. Ein schriftlicher Auftrag Hitlers existiert nicht, er war aber auch nicht erforderlich, um die Vernichtung in Gang zu setzen. Um die beteiligten Reichsbehörden zu informieren, lud Heydrich deren Vertreter zum 20. Januar 1942 in eine SS-eigene Villa am Großen Wannsee in Berlin ein. Die Teilnehmer vertraten im Rang von Staatssekretären und hohen SS-Offizieren Reichsministerien und zentrale SS-Dienststellen sowie Behörden wie den Generalgouverneur für die besetzten polnischen Gebiete. Das Protokoll führte Adolf Eichmann, der seit Ende 1939 das Referat IV B 4 („Judenreferat“) im RSHA leitete.

Die Besprechung am Wannsee eröffnete Heydrich mit der Feststellung, daß die Kompetenz in der Judenpolitik ausschließlich und ohne geographische Begrenzung beim Reichsführer SS Heinrich Himmler bzw. bei ihm als dem von ihm dazu Bevollmächtigten liege. Das Geschick, das mindestens elf Millionen Juden zugeadacht war, war im Protokoll der Konferenz unmißverständlich prognostiziert:

„Unter entsprechender Leitung sollen nun im Zuge der Endlösung die Juden in geeigneter Weise im Osten zum Arbeitseinsatz kommen. In großen Arbeitskolonnen, unter Trennung der Geschlechter, werden die arbeitsfähigen Juden straßenbauend in diese Gebiete geführt, wobei zweifellos ein Großteil durch natürliche Verminderung ausfallen wird. Der allfällig endlich verbleibende Restbestand wird, da es sich bei diesem zweifellos um den widerstandsfähigsten Teil handelt, entsprechend behandelt werden müssen, da dieser, eine natürliche Auslese darstellend, bei Freilassung als Keimzelle eines neuen jüdischen Aufbaues anzusprechen ist.“

Weil der Völkermord an den Juden auf der Tagesordnung stand, wird das Treffen am 20. Januar 1942 oft mißverstanden als der Tag, an dem der Holocaust „beschlossen“ worden sei. Abgesehen davon, daß eine Verabredung zur Vernichtung von Millionen Menschenleben die Kompetenz der Besprechungsteilnehmer überstiegen hätte, waren die Mordkommandos längst an der Arbeit. Das Protokoll der Wannseekonferenz ist trotzdem ein Schlüsseldokument des Holocaust, weil daraus zweifelsfrei hervorgeht, daß das NS-Regime die Ermordung von elf Millionen Juden in Europa beabsichtigte. Der Wehrmacht beim Überfall auf die Sowjetunion folgend waren seit Juni 1941 die „Einsatzgruppen der Sicherheitspolizei und des SD“ in Tätigkeit. Der Auftrag der Mordkommandos – insgesamt 3 000 Mann in vier „Einsatzgruppen“ – bestand darin, im Baltikum, in Weißrußland, in der Ukraine und auf der Krim potentielle Gegner zu liquidieren. Die Juden wurden in erster Linie zu diesem Personenkreis gerechnet und sie bildeten die meisten Opfer der Einsatzgruppen. Zwischen Juni 1941 und April 1942 sind von den aus SS und Polizei rekrutierten Mördern fast 560 000 Menschen getötet worden. Zur Taktik gehörten auch Pogrome, angezettelt mit Hilfe einheimischer Kollaborateure und vor allem Massenerschießungen. In Litauen und Lettland, in Weißrußland und in der Ukraine und in den anderen besetzten Gebieten fanden sich willige Helfer beim Holocaust, die als „Schutzmannschaften“ oder auch unorganisiert Judenhaß auslebten und den deutschen Mördern zur Hand gingen.

In Babi Jar, einer Schlucht am Stadtrand von Kiew, wurden an zwei Tagen Ende September 1941 33 771 Juden erschossen; in Ponary vor den Toren Wilnas wurden 60-70 000 Menschen erschossen, andere Mordstätten waren bei Riga eingerichtet, Erschießungsgruben kennzeichnen den nationalsozialistischen Machtbereich in Osteuropa. Seit Frühjahr 1943 war ein Spezialkommando der SS damit beschäftigt, die Spuren zu beseitigen. Juden mußten, ehe sie zuletzt selbst erschossen wurden, die Leichen exhumieren und verbrennen.

Die Mordmethoden waren inzwischen längst verfeinert worden. Das Erschießen ging nicht schnell genug und die Nerven der Mörder wurden dabei zu arg strapaziert. Auf der Suche nach effektiveren Mordwerkzeugen war man, auf die Erfahrungen und das Personal der Ermordung Behinderter und Geisteskranker in der „Euthanasie“-Aktion 1939/1940 zurückgreifend, auf die Verwendung von Giftgas verfallen. Kohlenmonoxyd wurde bei den „Gaswagen“ verwendet, es handelte sich um umgebaute Lastkraftwagen, deren Auspuffgase in den mit Menschen vollgestopften hermetisch abgedichteten Innenraum geleitet wurden. Nach kurzer Fahrt wurden die Leichen direkt ins Massengrab gekippt. Gaswagen wurden von den Einsatzgruppen in Weißrußland verwendet ebenso wie in Serbien; in Chelmno/Kulmhof bildeten sie die Ausrüstung eines Vernichtungslager.

Mitte 1942 lief die „Aktion Reinhardt“ an. Sie hatte die Tötung der Juden zum Ziel, die in den Ghettos auf polnischem Boden lebten und Zwangsarbeit für die deutsche Rüstungsindustrie

leisten mußten. Drei Vernichtungslager, Belzec, Sobibor und Treblinka, wurden als Mordstätten konzipiert, in ihnen endeten die meisten Ghetto-Bewohner. In Bialystok und in Warschau setzten sich verzweifelte Juden gegen die Deportation zur Wehr, leisteten heroischen, aber aussichtslosen Widerstand gegen die Deutschen, die schließlich schwere Waffen einsetzen mußten, um die Ghettos zu räumen.

Der Befehl Himmlers an den Kommandanten des KZ Auschwitz im Sommer 1941, eine quasi industrielle Tötungsmethode zu finden, leitete die letzte Phase des Massenmordens ein. Im September 1941 fand im Stammlager (Auschwitz I) ein erster Versuch mit dem Gift Zyklon B statt. Das an Kieselgur gebundene blausäurehaltige gasförmige Desinfektionsmittel ließ sich leicht und für die Mörder gefahrlos transportieren und handhaben. Ab Frühjahr 1942 wurde in Birkenau (Auschwitz II) in eigens errichteten (dann mehrfach umgebauten und vergrößerten) Gaskammern der geräuschlose und schnelle Massenmord praktiziert. Aus ganz Europa kommend endeten die Eisenbahntransporte auf der Rampe, wo die Arbeitsfähigen bei der Selektion zurückbehalten, alle anderen – in der Regel 90 % der Ankommenden – direkt in die Gaskammern getrieben wurden. Auch in Auschwitz versuchte die SS Spuren zu beseitigen, sprengte Gaskammern und Krematorien im Herbst 1944.

Eine Million Opfer sind für Auschwitz dokumentiert, 900 000 wurden in Treblinka zwischen Juli 1942 und August 1943 getötet. 600 000 in Belzec, 250 000 in Sobibor, 152 000 in Chelmno, mindestens 60 000 in Lublin-Majdanek. Die atavistischen Methoden des Massenmords durch Pogrom und Massaker, durch Exekutionen vor Erschießungsgruben, die die Opfer zuvor ausheben mußten, und in jeder Form sadistischen Totschlags blieben trotz der Existenz der Vernichtungslager aber an der Tagesordnung. „Aktionen“ nannten die Mörder ihr Vorgehen und gaben ihnen Decknamen wie „Erntefest“. In den Lagern Trawniki, Poniatowa und Majdanek wurden unter dieser Parole Anfang November 1943 mehr als 40 000 Juden erschossen.

Der Zivilisationsbruch hat eine lange Vorgeschichte, die freilich nur die ideologischen Voraussetzungen, nicht die Konsequenz der Verwirklichung ausgrenzender Vorurteile und feindseliger Konstrukte gegen die Minderheit der Juden erklärt. Seit den 40er Jahren des 19. Jahrhunderts wurde in Deutschland über „die Lösung der Judenfrage“ diskutiert. Im Zeichen eines rassenbiologisch determinierten pseudowissenschaftlich argumentierenden Antisemitismus, der auf der älteren religiös begründeten Judenfeindschaft der christlichen Kirchen aufbaute, wurde die Ausgrenzung der jüdischen Minderheit propagiert und dann die Rücknahme der Emanzipation, der bürgerlich-rechtlichen Gleichstellung der Juden gefordert. Was trotz aller Schmähschriften und vielem Getöse, trotz antisemitischer Parteibildungen und Agitation im 19. Jahrhundert politisch erfolglos blieb und in seiner sozialen Sprengkraft nicht mit der rabiaten Judenfeindschaft in Polen und Rußland zu vergleichen war, entwickelte sich auf dem Nährboden sozialer und politischer Frustration nach dem Ersten Weltkrieg in Deutschland als Teil der nationalsozialistischen Ideologie zur Heilslehre der Hitlerpartei und wurde 1933 Staatsdoktrin.

Von einem „eliminatorischen Antisemitismus“ der Deutschen, der behauptet wurde, um die These von der Folgerichtigkeit des Judenmords zu stützen, kann freilich keine Rede sein: Die Judenfeindschaft war in anderen Ländern stärker und wurde rabiat manifestiert. Um so schwieriger sind Erklärungsversuche des Holocaust. Sozialisationsdefekte (mündend im „auto-

ritären Charakter“), Obrigkeitsdenken, der Glaube an die nationalen Versprechungen der Hitlerdiktatur, mangelndes rechtsstaatliches Selbstbewußtsein, kompensiert durch Herrenmenschentum sind Elemente, die zur Erklärung gehören wie die Theorie der allmählichen Radikalisierung nationalsozialistischer Herrschaft oder das Modell einer rationalen auf Rassismus basierender Bevölkerungspolitik, die vernichtende Bevölkerungsbewegungen in Kauf nahm. Historiker diskutieren immer noch über die Intention des Judenmords (Welche Rolle spielte die Ideologie der Judenfeindschaft? Wann wurde er förmlich beschlossen? Bedurfte der Vernichtungsbefehl der Schriftform?) und über seine Funktion in den Strukturen nationalsozialistischer Politik. Eine rationale Erklärung des Völkermords an den Juden gibt es nicht.

Berlin, Mai 2006

---

Erstveröffentlichung in:

Deutsche Geschichte im 20. Jh.: Nationalsozialismus, Holocaust, Widerstand und Exil 1933-1945 Online, De Gruyter/K.G. Saur (2006–2022)
